# Supplementary material for: Negative photoconductivity of InAs nanowires
Source: Royal Society of Chemistry journal article supplement (doi:10.1039/c5cp06139c), 2015-11-17
Supplement: c5cp06139c1.pdf [file c5cp06139c1.pdf]

## Negative photoconductivity of InAs nanowire

Yuxiang Han,<sup>a</sup> Xiao Zheng,<sup>a</sup> Mengqi Fu,<sup>a</sup> Dong Pan,<sup>b</sup> Xing Li,<sup>a</sup> Yao Guo,<sup>a</sup> Jianhua Zhao,<sup>b</sup> Qing Chen<sup>a,\*</sup>

<sup>a</sup>Key laboratory for the Physics and Chemistry of Nanodevices and Department of Electronics, Peking University, Beijing 100871, People's Republic of China

<sup>b</sup>State Key Laboratory of Superlattices and Microstructures, Institute of Semiconductors, Chinese Academy of Sciences, Beijing 100083, China

### Supporting Information

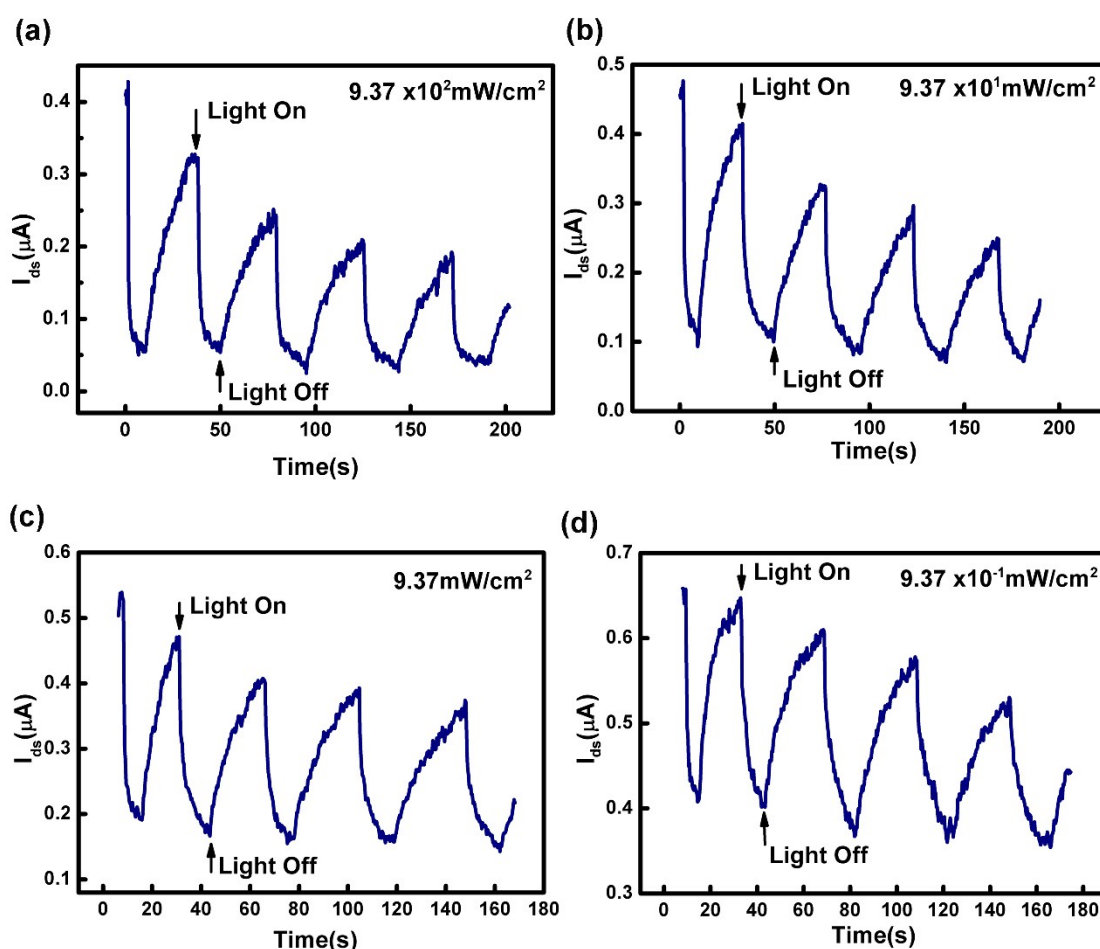

**Figure S1.** Time-resolved photocurrent rise and decay curves as obtained by application and removal of 633nm light illumination at  $V_{ds}=0.1$  V,  $V_{gs}=20$  V under different light intensity varying from  $9.37 \times 10^{-1} \text{ mW}\cdot\text{cm}^{-2}$  to  $9.37 \times 10^3 \text{ mW}\cdot\text{cm}^{-2}$ .

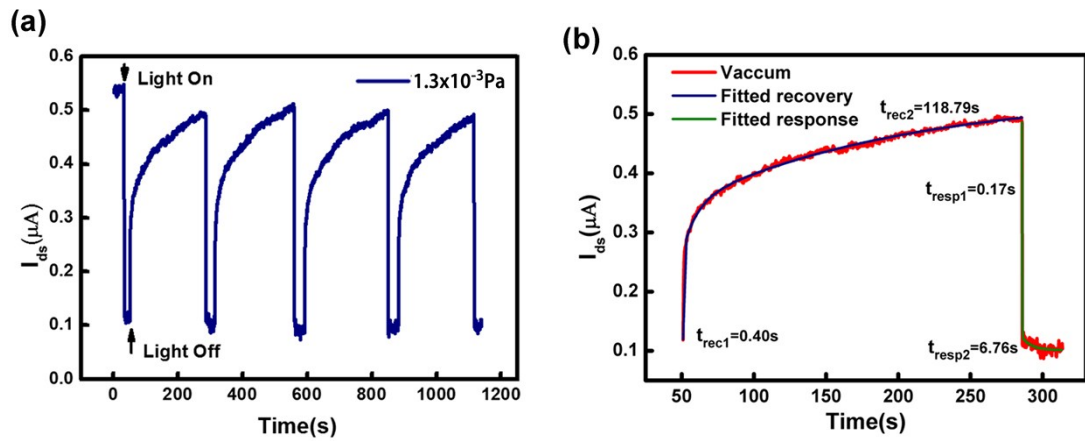

**Figure S2.** Photoelectrical response properties of InAs NW under 405 nm,  $9.37 \times 10^3$   $\text{mW}\cdot\text{cm}^{-2}$  light illumination at  $V_{\text{ds}}=0.1$  V,  $V_{\text{gs}}=30$  V in  $1.3 \times 10^{-3}$  Pa vacuum and (b) shows the fitting curve.

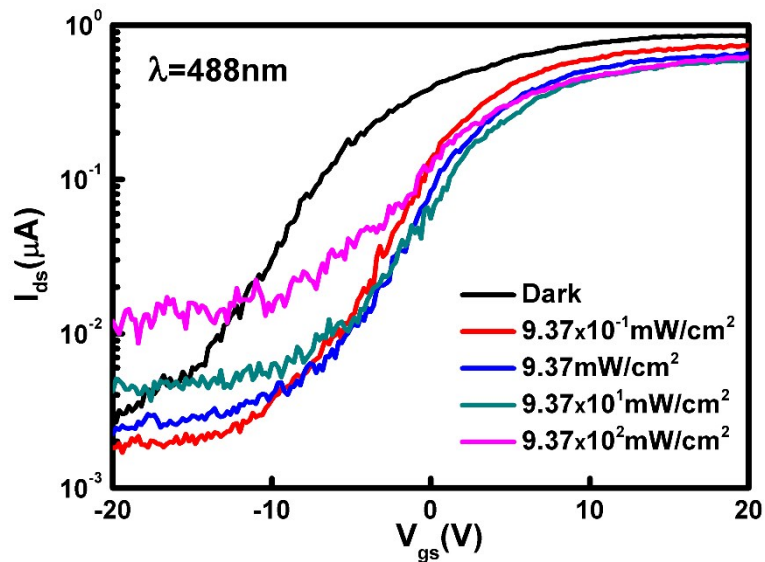

**Figure S3.** Logarithmic form of the  $I_{\text{d}}-V_{\text{g}}$  curves of the InAs NW FET under 488 nm light illumination.
